# Supplementary material for: Two is better than one: Social rewards from two agents enhance offline improvements in motor skills more than single agent
Source: PLoS One. 2020 Nov 4;15(11):e0240622. doi: 10.1371/journal.pone.0240622 (PMC7641341; doi:10.1371/journal.pone.0240622)
Supplement: S1 File — (XLSX) [file pone.0240622.s001.xlsx]

## Sheet: Data
Presence 1:collocated2:displayed	Number	Mean performance of trained sequence (Day 1)	Mean performance of trained sequence (Day 2)	Offline improvement (%)	Happiness rating	Degree of perceived praise
1	0	163	151.667	-6.95297	1	1
1	0	128.333	126.667	-1.2987	4	4
1	0	226.333	248.667	9.86745	4	1
1	0	125.333	126	0.531915	4	3
1	0	134.333	140.333	4.4665	4	2
1	0	155	171.333	10.5376	3	4
1	0	162	172.333	6.3786	4	4
1	0	228	244.667	7.30994	1	1
1	0	155.667	163.333	4.92505	3	3
1	0	172.667	176	1.9305	5	3
1	0	132.667	134	1.00503	6	3
1	0	142.667	154	7.94393	3	2
1	0	186	191	2.68817	4	4
1	0	115.667	118.667	2.59366	2	2
1	0	124.333	119	-4.28954	4	3
1	0	128	133.667	4.42708	4	3
1	1	189	224.333	18.6949	7	7
1	1	187.667	164	-12.611	6	6
1	1	146	172	17.8082	6	6
1	1	200.667	199.667	-0.498339	5	6
1	1	139.667	151.333	8.35322	5	7
1	1	134	153.333	14.4279	6	7
1	1	161.667	182.333	12.7835	5	6
1	1	162.667	182.667	12.2951	6	6
1	1	160.333	179.667	12.0582	5	6
1	1	162.333	179.667	10.6776	5	6
1	1	177	183.667	3.76648	5	6
1	1	186.333	201.667	8.22898	5	6
1	1	118.333	123.667	4.50704	5	5
1	1	153.333	166.333	8.47826	5	6
1	1	161.667	169.667	4.94845	5	6
1	1	126	133	5.55556	4	6
1	2	150.333	178.667	18.847	5	5
1	2	178	209.667	17.7903	4	5
1	2	164.667	204.667	24.2915	7	7
1	2	130.333	143.667	10.2302	7	7
1	2	198.667	229.333	15.4362	3	5
1	2	145	154.667	6.66667	4	6
1	2	122.667	143.667	17.1196	5	7
1	2	177	198.667	12.2411	6	7
1	2	174.333	198.667	13.9579	6	7
1	2	161	183.333	13.8716	5	6
1	2	159	176.333	10.9015	6	7
1	2	113.333	136	20	7	7
1	2	183	214	16.9399	7	7
1	2	111	126.333	13.8138	6	7
1	2	174.667	193.333	10.687	5	6
1	2	117.667	129	9.63173	6	6
2	0	147.333	155	5.20362	3	4
2	0	118	130	10.1695	4	2
2	0	240	237	-1.25	4	4
2	0	138.333	140.333	1.44578	4	2
2	0	109.333	113.667	3.96341	5	3
2	0	151.333	152.333	0.660793	5	4
2	0	124	133.333	7.52688	5	3
2	0	152.667	165.333	8.29694	4	3
2	0	109.333	116	6.09756	1	1
2	0	152.333	152	-0.218818	4	4
2	0	114.667	118.667	3.48837	4	4
2	0	142.667	143	0.233645	2	1
2	0	166.333	171	2.80561	3	3
2	0	176	173.333	-1.51515	2	2
2	0	135	144.333	6.91358	4	3
2	0	155	154.333	-0.430108	3	3
2	1	141.333	152.333	7.78302	5	6
2	1	140.333	143.333	2.13777	6	6
2	1	226.667	227	0.147059	3	7
2	1	158	167.667	6.11814	3	4
2	1	153	163.333	6.75381	5	6
2	1	203.667	209.333	2.78232	6	7
2	1	173	194.333	12.3314	6	6
2	1	141.667	142.333	0.470588	5	5
2	1	145	158.667	9.42529	4	5
2	1	138.667	154	11.0577	5	6
2	1	130.667	144	10.2041	6	6
2	1	166.667	165	-1	5	6
2	1	122	128	4.91803	5	7
2	1	146.667	152.667	4.09091	7	6
2	1	144.667	149	2.99539	6	6
2	1	210	239.333	13.9683	5	5
2	2	156.667	173.667	10.8511	5	6
2	2	113	137	21.2389	7	7
2	2	139.333	162.333	16.5072	7	7
2	2	126.333	141.667	12.1372	4	5
2	2	117	142	21.3675	5	7
2	2	163.667	171.667	4.88798	3	6
2	2	107	119.333	11.5265	6	6
2	2	117.333	144.667	23.2955	6	6
2	2	172.333	187.333	8.70406	4	5
2	2	138.667	163	17.5481	4	6
2	2	144	162	12.5	5	6
2	2	168.333	184	9.30693	3	7
2	2	169	177.667	5.12821	7	7
2	2	154	169	9.74026	6	6
2	2	169.667	175	3.14342	6	7
2	2	168	185.333	10.3175	6	5
